# Supplementary material
Source: ML conference proceedings conference paper supplement (https://openaccess.thecvf.com/content/CVPR2024/html/Liu_Rethinking_Interactive_Image_CVPR_2024_paper.html)
Supplement: Supplementary file 1 [file Liu_Rethinking_Interactive_Image_CVPR_2024_supplemental.zip]

# Rethinking Interactive Image Segmentation with Low Latency, High Quality, and Diverse Prompts

## Supplementary Material

### 1. Evaluation with the Text Prompt

This section supplements the “Experiments” section in the main paper. Table 1 quantitatively evaluates the text prompt. The models were trained on RefCOCO [2] and evaluated on its testA subset across three settings: text-only, click-only, and a combination of text and click (text+click). Following PhraseClick [1], we used three clicks for the click-only setting and two clicks for the text+click setting. While our text prompt had much room to improve, it yielded promising results combined with visual prompts.

| Method          | Interaction | Text | Click | mIoU (%) |
|-----------------|-------------|------|-------|----------|
| PhraseClick [1] | Text-only   | ✓    | ✗     | 50.98    |
| Ours (SA×2)     | Text-only   | ✓    | ✗     | 58.32    |
| Ours (SA×2)     | Click-only  | ✗    | ✓     | 82.79    |
| Ours (SA×2)     | Text+Click  | ✓    | ✓     | 85.95    |

Table 1. Evaluation with text prompt on the testA of RefCOCO. Our model attained enhanced performance by integrating text and click prompts, surpassing the results achieved with clicks alone.

### References

- [1] Henghui Ding, Scott Cohen, Brian Price, and Xudong Jiang. Phraseclick: toward achieving flexible interactive segmentation by phrase and click. In *Computer Vision–ECCV 2020: 16th European Conference, Glasgow, UK, August 23–28, 2020, Proceedings, Part III 16*, pages 417–435. Springer, 2020. 1
- [2] Sahar Kazemzadeh, Vicente Ordonez, Mark Matten, and Tamara Berg. Referitgame: Referring to objects in photographs of natural scenes. In *Proceedings of the 2014 conference on empirical methods in natural language processing (EMNLP)*, pages 787–798, 2014. 1
